# Supplementary material for: Thermal plasma processing of Moringa oleifera biochars: adsorbents for fluoride removal from water
Source: Royal Society of Chemistry journal article supplement (doi:10.1039/d2ra07514h), 2023-01-01
Supplement: d2ra07514h1.pdf [file d2ra07514h1.pdf]

## Supplementary Information

### Preparation of *Moringa oleifera* biochar by thermal plasma processing: Adsorbents for fluoride removal from water

Moumita Gourai<sup>a</sup>, Ashok K. Nayak<sup>a,b</sup>, Partha S Nial<sup>a,b</sup>, Bijaylaxmi Satpathy<sup>c</sup>, Rajashree Bhuyan<sup>a</sup>, Saroj K. Singh<sup>a,b</sup>, Umakanta Subudhi<sup>a,b,\*</sup>

<sup>a</sup>Biochemistry & Biophysics Laboratory, CSIR-Institute of Minerals & Materials Technology, Bhubaneswar 751 013, Odisha

<sup>b</sup>Academy of Scientific & Innovative Research (AcSIR), Ghaziabad 201002, Uttar Pradesh, India.

<sup>c</sup>Rural Water Supply and Sanitation Department, Nuapada District 766105, Odisha

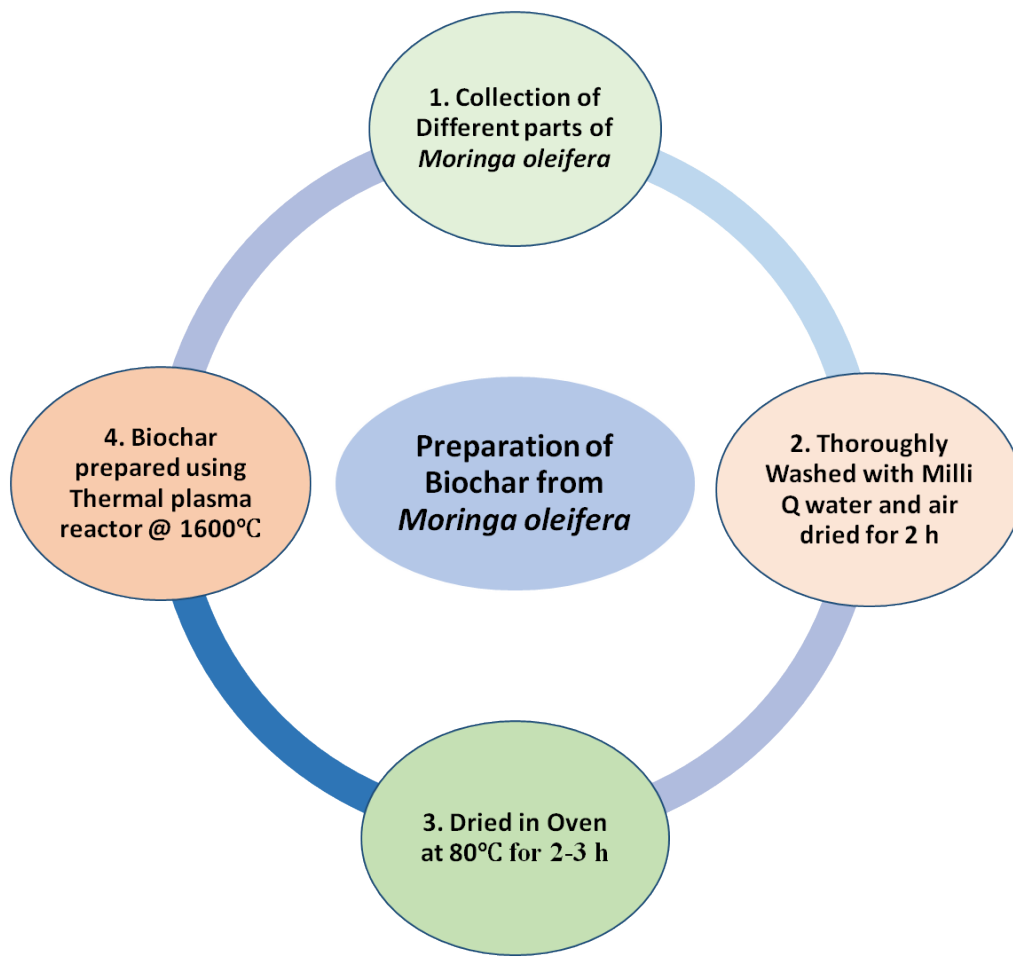

Flow-sheet of preparation of *Moringa oleifera* biochar

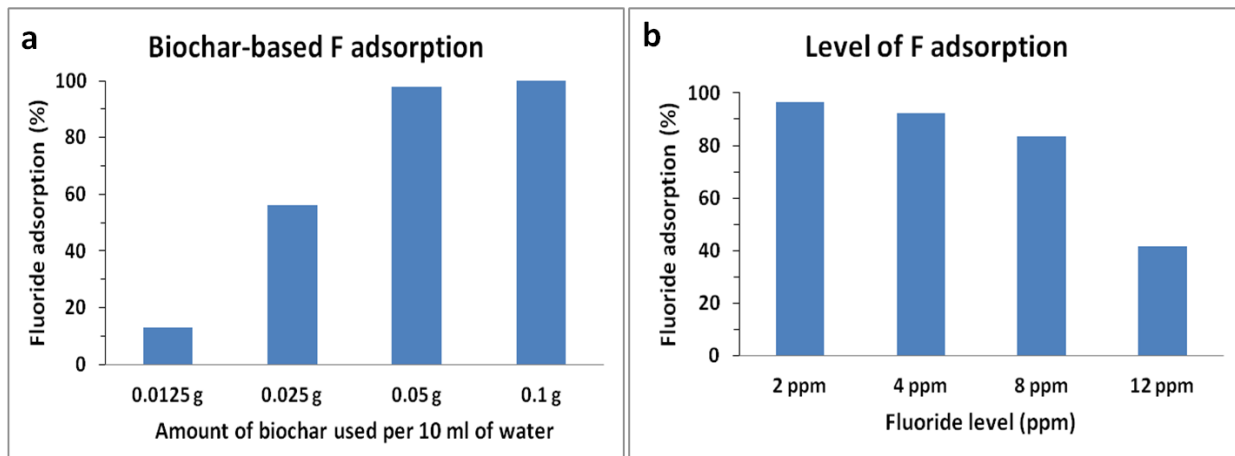

**Fig. S1** The absorption efficiency was examined with different amount of *Moringa* seed biochar while the fluoride concentration is 2 ppm. The absorption efficiency is maximum (100%) in case of 0.1g of seed biochar for 2 ppm fluoride in 1h (a). *Moringa* seed biochars able to remove 96%, 92%, 84% and 42 % of fluoride from 2 ppm, 4 ppm, 8 ppm and 12 ppm fluoride solution, respectively (b).

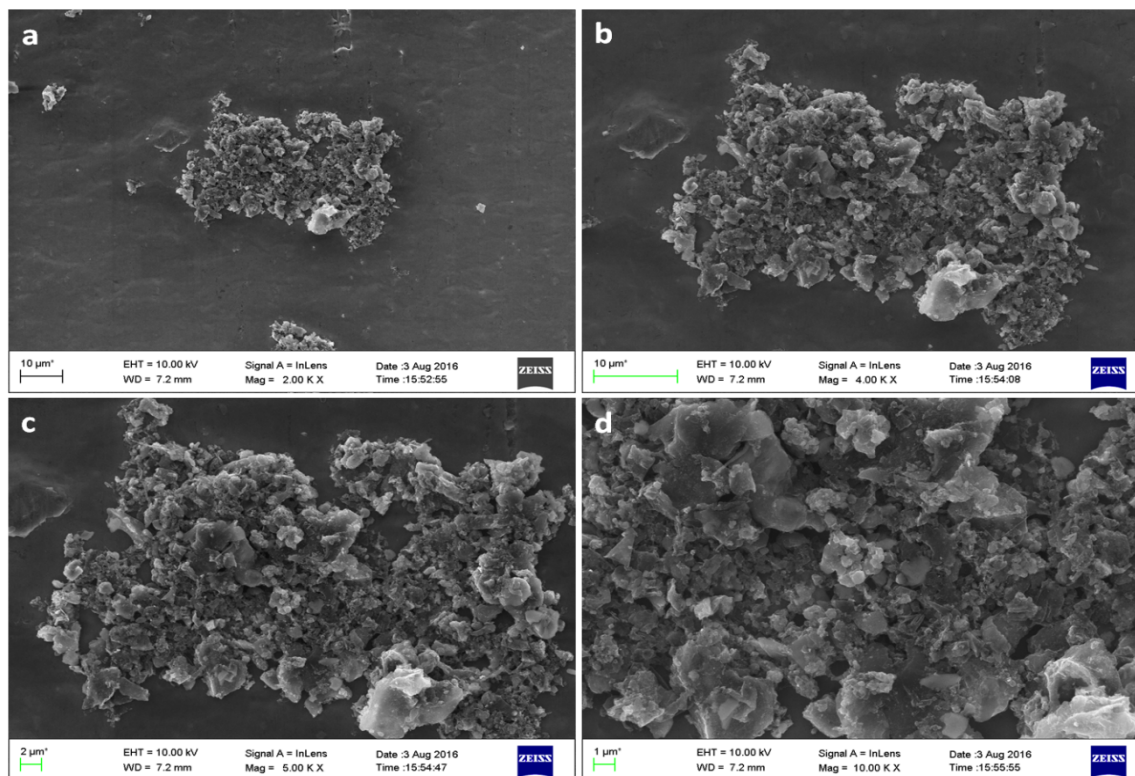

**Fig. S2** FESEM images of *Moringa* leaf biochar before fluoride adsorption. All images shows higher surface area and porosity.

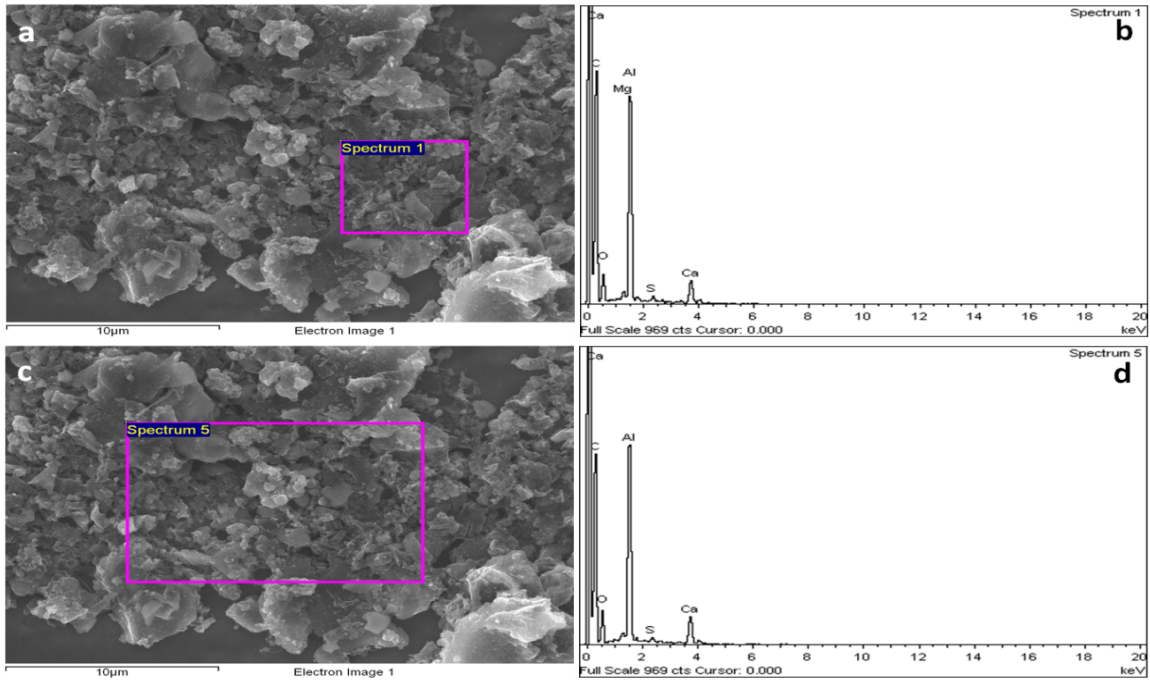

**Fig. S3** EDX spectra of *Moringa* leaf biochar showing the presence of Ca, C, O, Al, Mg, and S.

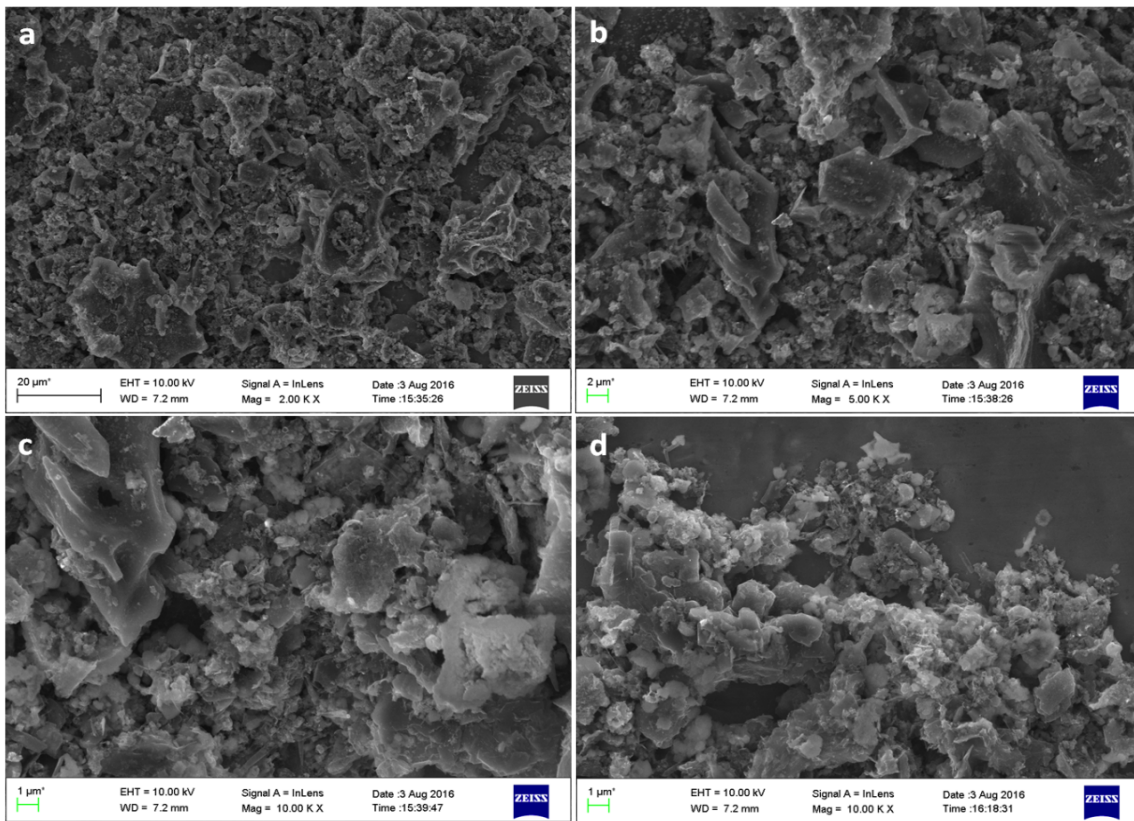

**Fig. S4** FESEM images of *Moringa* leaf biochar after fluoride adsorption.

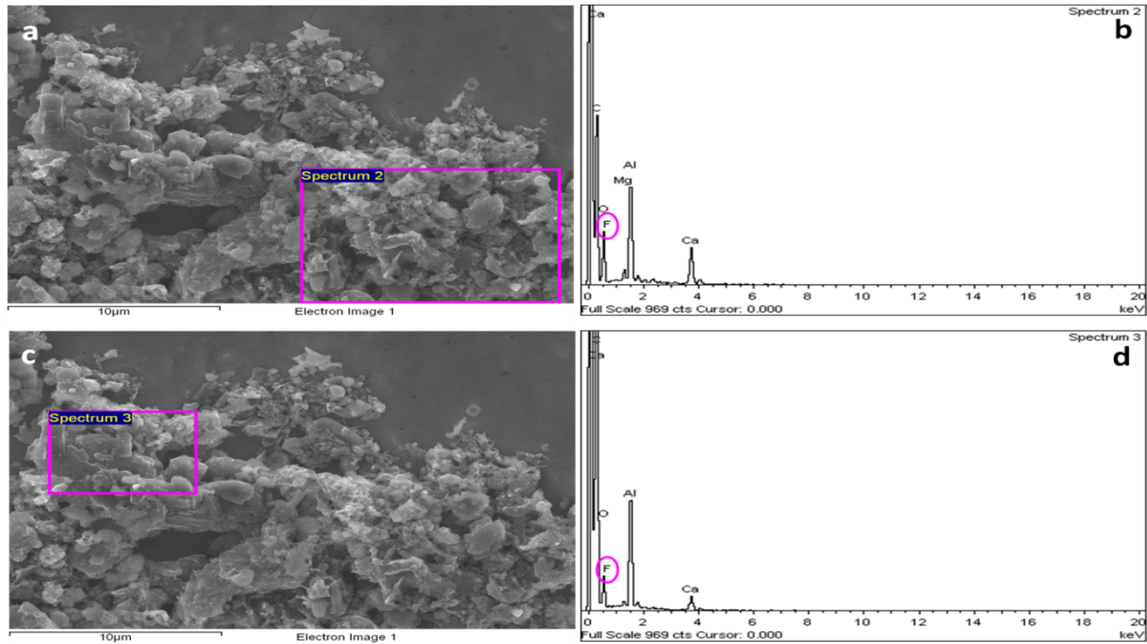

**Fig. S5** EDX spectra of *Moringa* leaf biochar showing the presence of Ca, C, O, F, Al, and Mg. Aggregation appeared in highly porous leaf biochar surfaces due to adsorption.

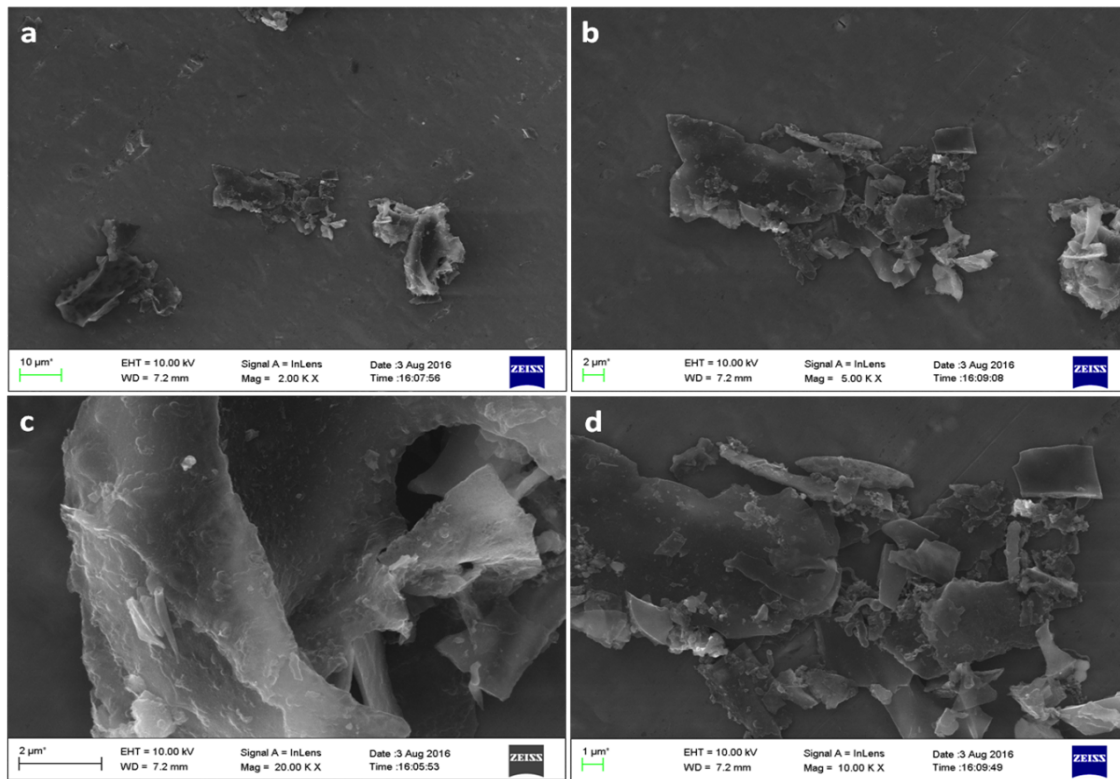

**Fig. S6** FESEM images of *Moringa* seed biochar after fluoride adsorption showing low surface area and low porosity.



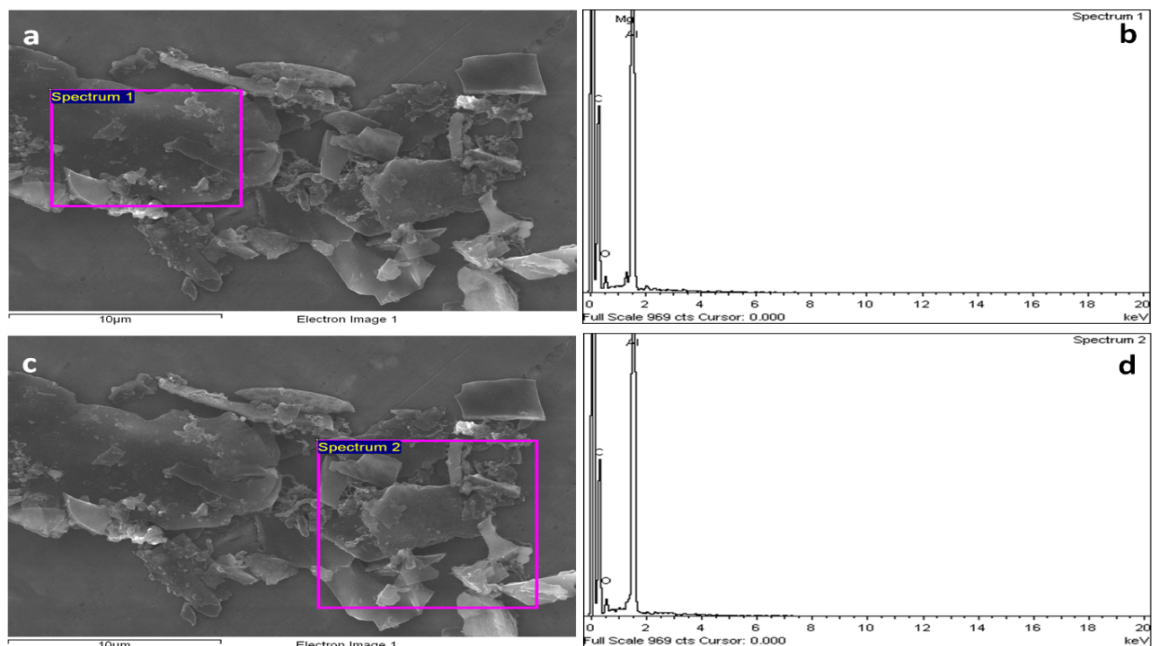

**Fig. S7** EDX spectra of *Moringa* seed biochar showing the presence of C, O, Al, Mg.

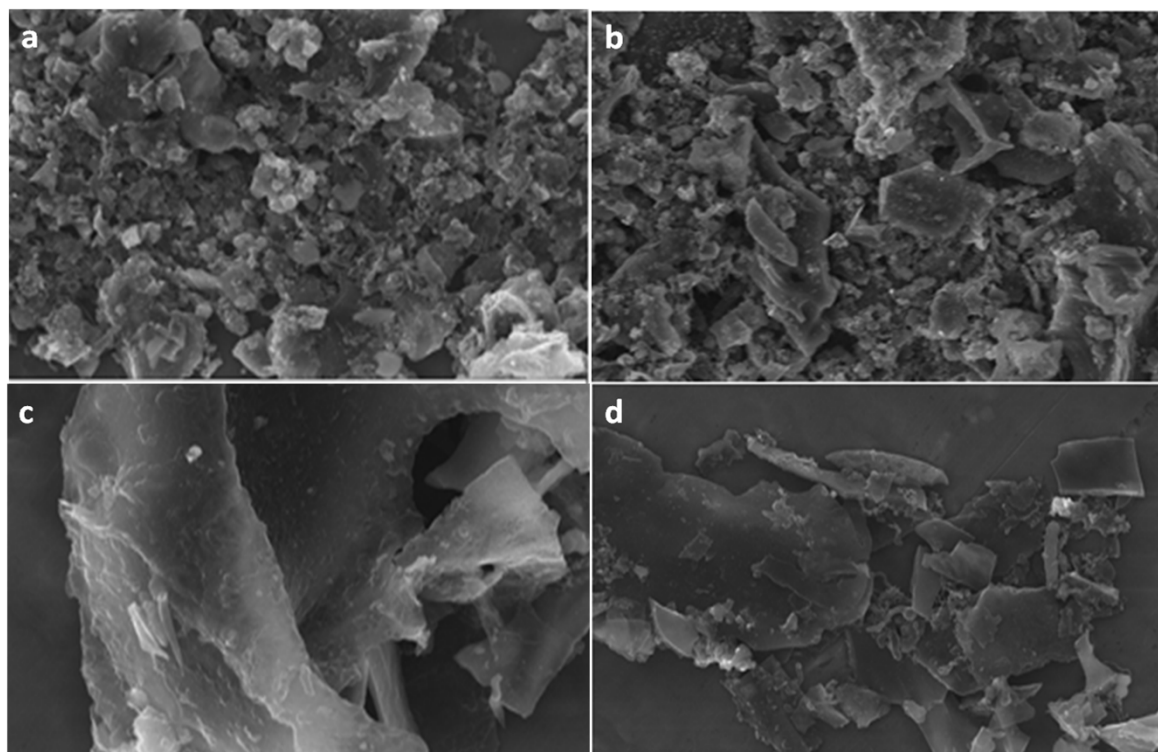

**Fig. S8** Comparison of the SEM images before and after fluoride adsorption in leaf and seed biochar. Porous surface of leaf biochar before (a) and after (b) the fluoride removal, while sheet like surface of the seed biochar before (c) and after (d) the adsorption of fluoride.

**Table S1** Collection of fluoride contaminated water from different villages of the Nuapada district in the state of Odisha such as Kotamal-Makardampada (20°24'46"N 82°37'19"E), Pandrapathar (20°34'41"N 82°39'25"E), Karlakot-Kadobhata (20°22'52"N 82°37'24"E), Kotamal-Jhakarpada (20°24'35"N 82°37'20"E), and Dohelpada (20°33'50"N 82°38'57"E) and characterization of fluoride content.

| Sample | Block | Gram Panchyat | Village      | Habitation                   | pH   | Fluoride (ppm) |
|--------|-------|---------------|--------------|------------------------------|------|----------------|
| 1      | Boden | Karlakot      | Kotamal      | Makardampada                 | 7.8  | 0.932          |
| 2      | Komna | Buddhikomna   | Pandrapathar | Pandrapathar                 | 7.26 | 4.028          |
| 3      | Boden | Karlakot      | Karlakot     | Kadobhata                    | 7.45 | 3.31           |
| 4      | Boden | Karlakot      | Kotamal      | Jhakarpada                   | 7.7  | 3.97           |
| 5      | Komna | Kureswar      | Dohelpada    | Sri Sathya Sai Water Project | 7.6  | 6.12           |

**Table S2:** Elemental composition of leaf and seed biochar of *Moringa oleifera*

| Element | % in Leaf biochar | % in Seed biochar |
|---------|-------------------|-------------------|
| C       | 79.43             | 72.13             |
| O       | 10.18             | 2.74              |
| Al      | 6.44              | 24.95             |
| S       | 0.43              | 0.0               |
| Ca      | 3.38              | 0.0               |
| Mg      | 0.47              | 0.55              |
